# Supplementary material for: Poly(ethylene glycol) nanocomposites of sub-nanometer metal oxide clusters for dynamic semi-solid proton conductive electrolytes
Source: PubMed Central journal article supplement (PMC6836960; doi:10.1039/c9sc02779c), 2019-07-11
Supplement: SC-010-C9SC02779C-s001.pdf [file SC-010-C9SC02779C-s001.pdf]

## Electronic Supplementary Information

### Poly(Ethylene Glycol) Nanocomposites of Sub-Nanometer Metal Oxide Clusters for Dynamic Semi-Solid Proton Conductive Electrolytes

Zhao Zheng,<sup>a</sup> Qianjie Zhou,<sup>a</sup> Mu Li<sup>a</sup> and Panchao Yin<sup>\*a</sup>

*a. South China Advanced Institute for Soft Matter Science and Technology & State  
Key Laboratory of Luminescent Materials and Devices, South China University of  
Technology, Guangzhou, 510640, P. R. China.*

#### Content

|                                                                                                                                                             |   |
|-------------------------------------------------------------------------------------------------------------------------------------------------------------|---|
| 1. Details for MOV S1 .....                                                                                                                                 | 2 |
| 2. Samples used in this work .....                                                                                                                          | 2 |
| 3. The <i>d-cals</i> calculation method .....                                                                                                               | 2 |
| 4. The FT-IR spectra of PEG400, PW <sub>12</sub> and PEG400-PW <sub>12</sub> nanocomposites.....                                                            | 4 |
| 5. Impedance spectra of PEG400-70%PW <sub>12</sub> nanocomposites and the table of the<br>conductivities of the PEG400-PW <sub>12</sub> nanocomposites..... | 4 |
| 6. DLS data of the PEG400-PW <sub>12</sub> nanocomposites .....                                                                                             | 5 |
| 7. The flow curves of PEG400-70%PW <sub>12</sub> nanocomposites at 323 K.....                                                                               | 6 |
| 8. The relationship between shear rate and shear stress.....                                                                                                | 6 |
| 9. The relationship between viscosities and volume fraction of PW <sub>12</sub> in the<br>nanocomposites .....                                              | 7 |
| 10. Cyclic curves of shear rate and shear stress .....                                                                                                      | 7 |
| 11. <i>Ea</i> of the PEG400-PW <sub>12</sub> nanocomposites.....                                                                                            | 8 |
| 12. Fitting curves of flow curves.....                                                                                                                      | 9 |

## 1. Details for MOV S1

PEG400-70%PW<sub>12</sub> nanocomposite behaves like solid with negligible flow at static state which is showed in Fig. 4e. Meanwhile, the shear thinning property of this sample enables its convenient processability and wettability to electrodes. There is a video MOV S1 in the attachments, which shows the fluidity of PEG400-70%PW<sub>12</sub> composite under an external shear force in a syringe. These typical characteristics of pseudo-plastic fluid makes PEG400-PW<sub>12</sub> an ideal candidate for semi-solid proton conductors.

## 2. Samples used in this work

**Table S1.** Samples used in this work.

| Sample                     | PEG400 [g] | H <sub>3</sub> PW <sub>12</sub> O <sub>40</sub> [g] |
|----------------------------|------------|-----------------------------------------------------|
| PEG400                     | 10         | 0                                                   |
| PEG400-10%PW <sub>12</sub> | 9          | 1                                                   |
| PEG400-20%PW <sub>12</sub> | 8          | 2                                                   |
| PEG400-30%PW <sub>12</sub> | 7          | 3                                                   |
| PEG400-40%PW <sub>12</sub> | 6          | 4                                                   |
| PEG400-50%PW <sub>12</sub> | 5          | 5                                                   |
| PEG400-60%PW <sub>12</sub> | 4          | 6                                                   |
| PEG400-70%PW <sub>12</sub> | 3          | 7                                                   |
| PEG400-80%PW <sub>12</sub> | 2          | 8                                                   |

## 3. The *d-cals* calculation method

The density of PEG400:  $\rho$  (PEO) = 1.279 g cm<sup>-3</sup>

The density of PW<sub>12</sub>:  $\rho$  (PW<sub>12</sub>) = 7.16 g cm<sup>-3</sup>

Based on these values, the calculation method of the distance between PW<sub>12</sub> is shown as bellow:

The number of PW<sub>12</sub>:

$$\text{Number of } PW_{12} = \frac{\text{Mass of } PW_{12}}{\text{Molecular weight of } PW_{12}} \times N_A$$

The volume per  $PW_{12}$ :

$$Volume\ per\ PW_{12} = \frac{\frac{Mass\ of\ PEG400}{\rho(PEG400)} + \frac{Mass\ of\ PW_{12}}{\rho(PW_{12})}}{Number\ of\ PW_{12}}$$

The distance between  $PW_{12}$ :

$$d - cal = \sqrt[3]{Volume\ per\ PW_{12}}$$

The parameters were normalized with the value of  $d-cal$  of PEG400-20% $PW_{12}$  as 1.

The  $d-cals$  of nanocomposites are listed in the Table S2 below:

**Table S2.** The  $d-cals$  of nanocomposites.

| Sample               | $d-cals$ |
|----------------------|----------|
| PEG400-20% $PW_{12}$ | 1        |
| PEG400-30% $PW_{12}$ | 0.8258   |
| PEG400-40% $PW_{12}$ | 0.7381   |
| PEG400-50% $PW_{12}$ | 0.6553   |
| PEG400-60% $PW_{12}$ | 0.5865   |
| PEG400-70% $PW_{12}$ | 0.5259   |

The  $d-exps$  of nanocomposites are listed in the Table S3 below:

**Table S3.** The  $d-exps$  of nanocomposites.

| Sample               | $d-exps$ |
|----------------------|----------|
| PEG400-20% $PW_{12}$ | 1        |
| PEG400-30% $PW_{12}$ | 0.8266   |
| PEG400-40% $PW_{12}$ | 0.7646   |
| PEG400-50% $PW_{12}$ | 0.6975   |
| PEG400-60% $PW_{12}$ | 0.6245   |
| PEG400-70% $PW_{12}$ | 0.5697   |

#### 4. The FT-IR spectra of PEG400, PW<sub>12</sub> and PEG400-PW<sub>12</sub> nanocomposites

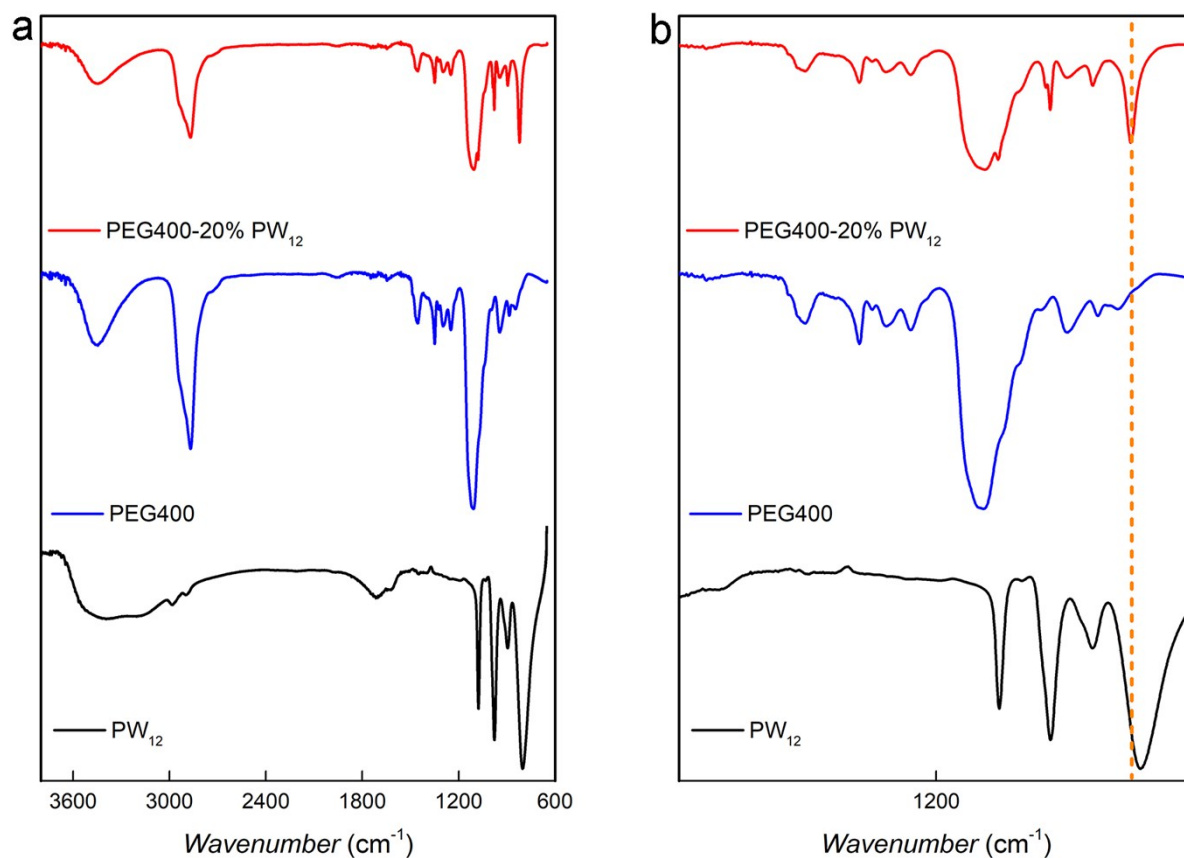

Fig. S1 FTIR spectra of PEG400, PW<sub>12</sub> and PEG400-20%PW<sub>12</sub>.

#### 5. Impedance spectra of PEG400-70%PW<sub>12</sub> nanocomposites and the table of the conductivities of the PEG400-PW<sub>12</sub> nanocomposites

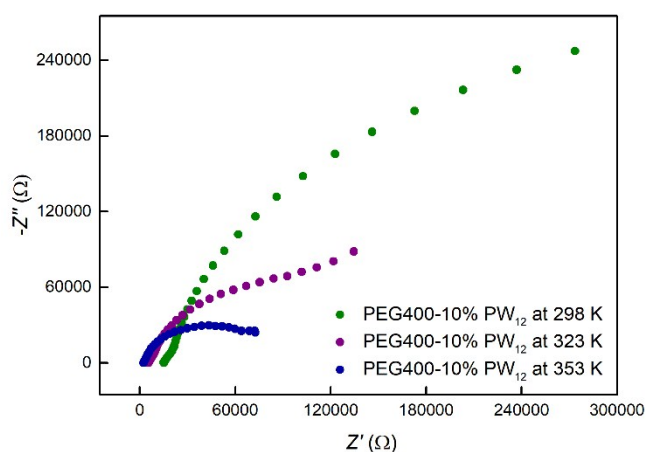

Fig. S2 Impedance spectra of PEG400-70%PW<sub>12</sub> nanocomposites.

Table S4. The conductivities ( $\sigma$ ) of the PEG400-PW<sub>12</sub> nanocomposites.

| Sample                     | $\sigma$ at 298 K [ $S \cdot cm^{-1}$ ] | $\sigma$ at 323 K [ $S \cdot cm^{-1}$ ] | $\sigma$ at 353K [ $S \cdot cm^{-1}$ ] |
|----------------------------|-----------------------------------------|-----------------------------------------|----------------------------------------|
| PEG400                     | $7.4 \times 10^{-6}$                    | $1.3 \times 10^{-5}$                    | $2.9 \times 10^{-5}$                   |
| PEG400-10%PW <sub>12</sub> | $6.5 \times 10^{-5}$                    | $1.8 \times 10^{-4}$                    | $4.2 \times 10^{-4}$                   |
| PEG400-20%PW <sub>12</sub> | $1.4 \times 10^{-4}$                    | $4.2 \times 10^{-4}$                    | $1.0 \times 10^{-3}$                   |
| PEG400-50%PW <sub>12</sub> | $4.0 \times 10^{-4}$                    | $1.2 \times 10^{-3}$                    | $3.5 \times 10^{-3}$                   |
| PEG400-70%PW <sub>12</sub> | $1.4 \times 10^{-3}$                    | $3.6 \times 10^{-3}$                    | $1.0 \times 10^{-2}$                   |

## 6. DLS data of the PEG400-PW<sub>12</sub> nanocomposites

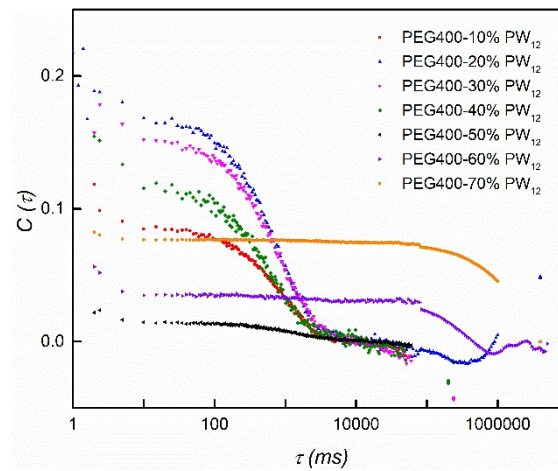

**Fig. S3** The correlation functions of PEG400-PW<sub>12</sub> nanocomposites (red for PEG400-10%PW<sub>12</sub>, light blue for PEG400-20%PW<sub>12</sub>, rose pink for PEG400-30%PW<sub>12</sub>, green for PEG400-40%PW<sub>12</sub>, black for PEG400-50%PW<sub>12</sub>, purple for PEG400-60%PW<sub>12</sub>, orange for PEG400-70%PW<sub>12</sub>).

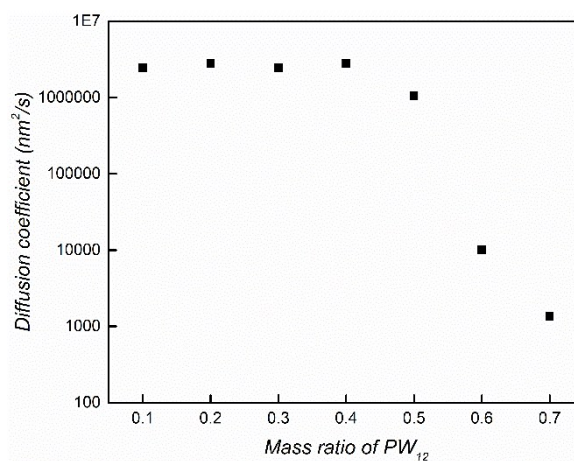

**Fig. S4** The relationship between diffusion coefficients and mass ratio of PW<sub>12</sub> in the nanocomposites.

## 7. The flow curves of PEG400-70%PW<sub>12</sub> nanocomposites at 323 K

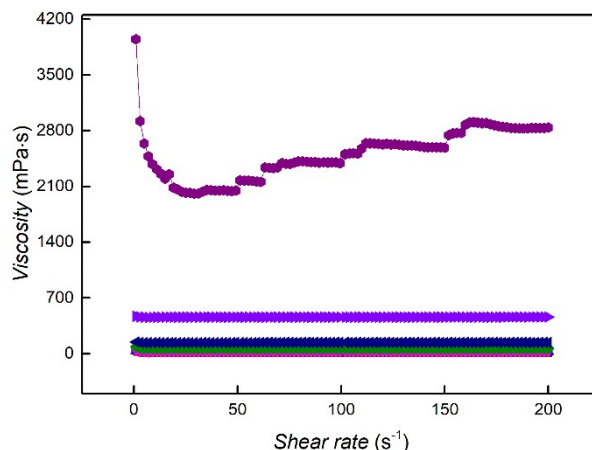

**Fig. S5** The flow curves of PEG400-PW<sub>12</sub> nanocomposites at 323 K (black for pure PEG400, red for PEG400-10%PW<sub>12</sub>, light blue for PEG400-20%PW<sub>12</sub>, rose pink for PEG400-30%PW<sub>12</sub>, green for PEG400-40%PW<sub>12</sub>, dark blue for PEG400-50%PW<sub>12</sub>, light purple for PEG400-60%PW<sub>12</sub>, dark purple for PEG400-70%PW<sub>12</sub>).

## 8. The relationship between shear rate and shear stress

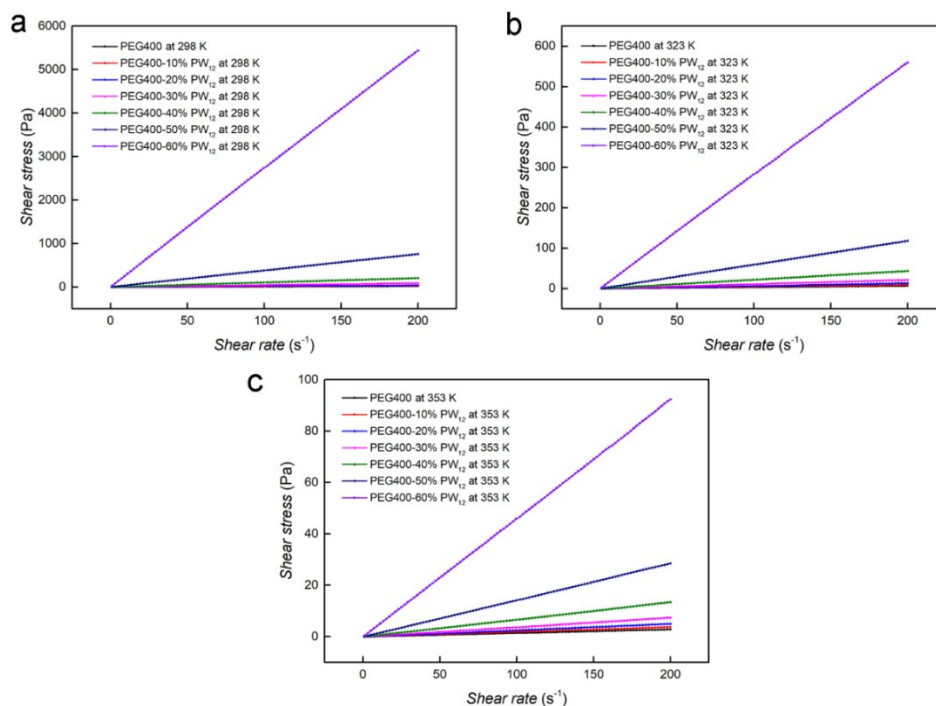

**Fig. S6** The linear relationship between shear rate and shear stress for PEG400, PEG400-10%PW<sub>12</sub>, PEG400-20%PW<sub>12</sub>, PEG400-30%PW<sub>12</sub>, PEG400-40%PW<sub>12</sub>, PEG400-50%PW<sub>12</sub>, and PEG400-60%PW<sub>12</sub> at 298 K, 323 K and 353 K, respectively.

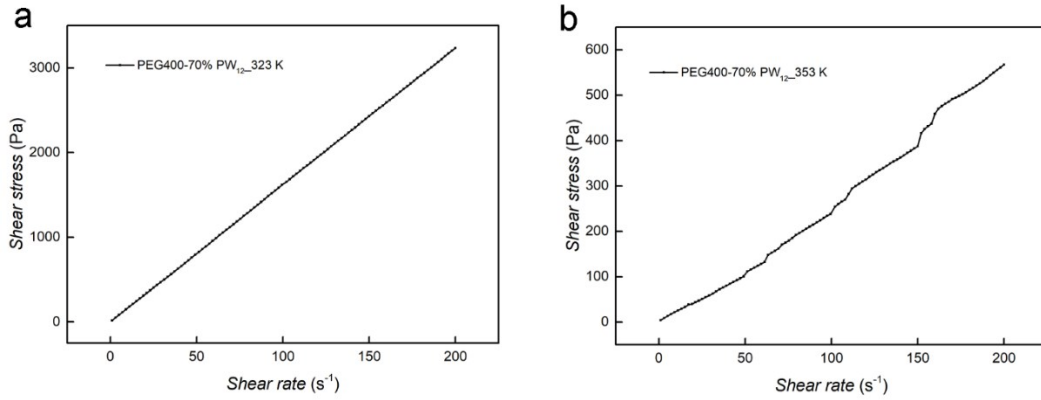

**Fig. S7** The relationship between shear rate and shear stress for PEG400-70%PW<sub>12</sub> at 323 K and 353 K, respectively.

### 9. The relationship between viscosities and volume fraction of PW<sub>12</sub> in the nanocomposites

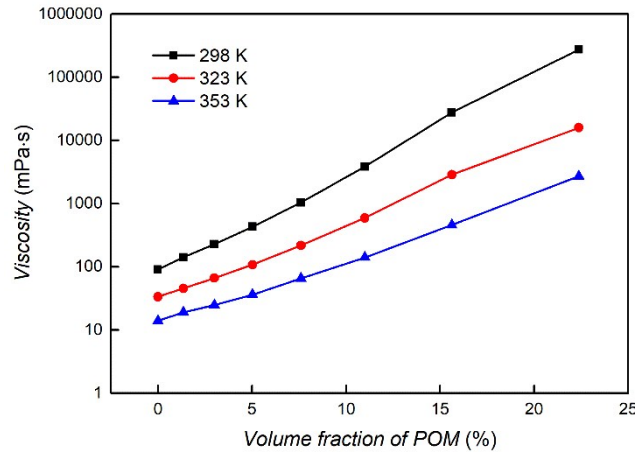

**Fig. S8** The relationship between viscosities and volume fraction of PW<sub>12</sub> in the nanocomposites at different temperature.

### 10. Cyclic curves of shear rate and shear stress

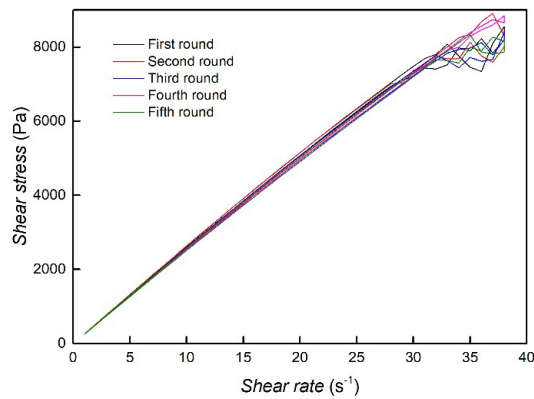

**Fig. S9** The relationship between shear rate and shear stress for PEG400-70%PW<sub>12</sub> nanocomposite.

## 11. *Ea* of the PEG400-PW<sub>12</sub> nanocomposites

**Table S5.** *Ea* of PEG400-PW<sub>12</sub> nanocomposites.

| Sample                     | <i>Ea</i> [eV] |
|----------------------------|----------------|
| PEG400                     | 0.094          |
| PEG400-10%PW <sub>12</sub> | 0.128          |
| PEG400-20%PW <sub>12</sub> | 0.137          |
| PEG400-50%PW <sub>12</sub> | 0.150          |
| PEG400-70%PW <sub>12</sub> | 0.137          |



## 12. Fitting curves of flow curves

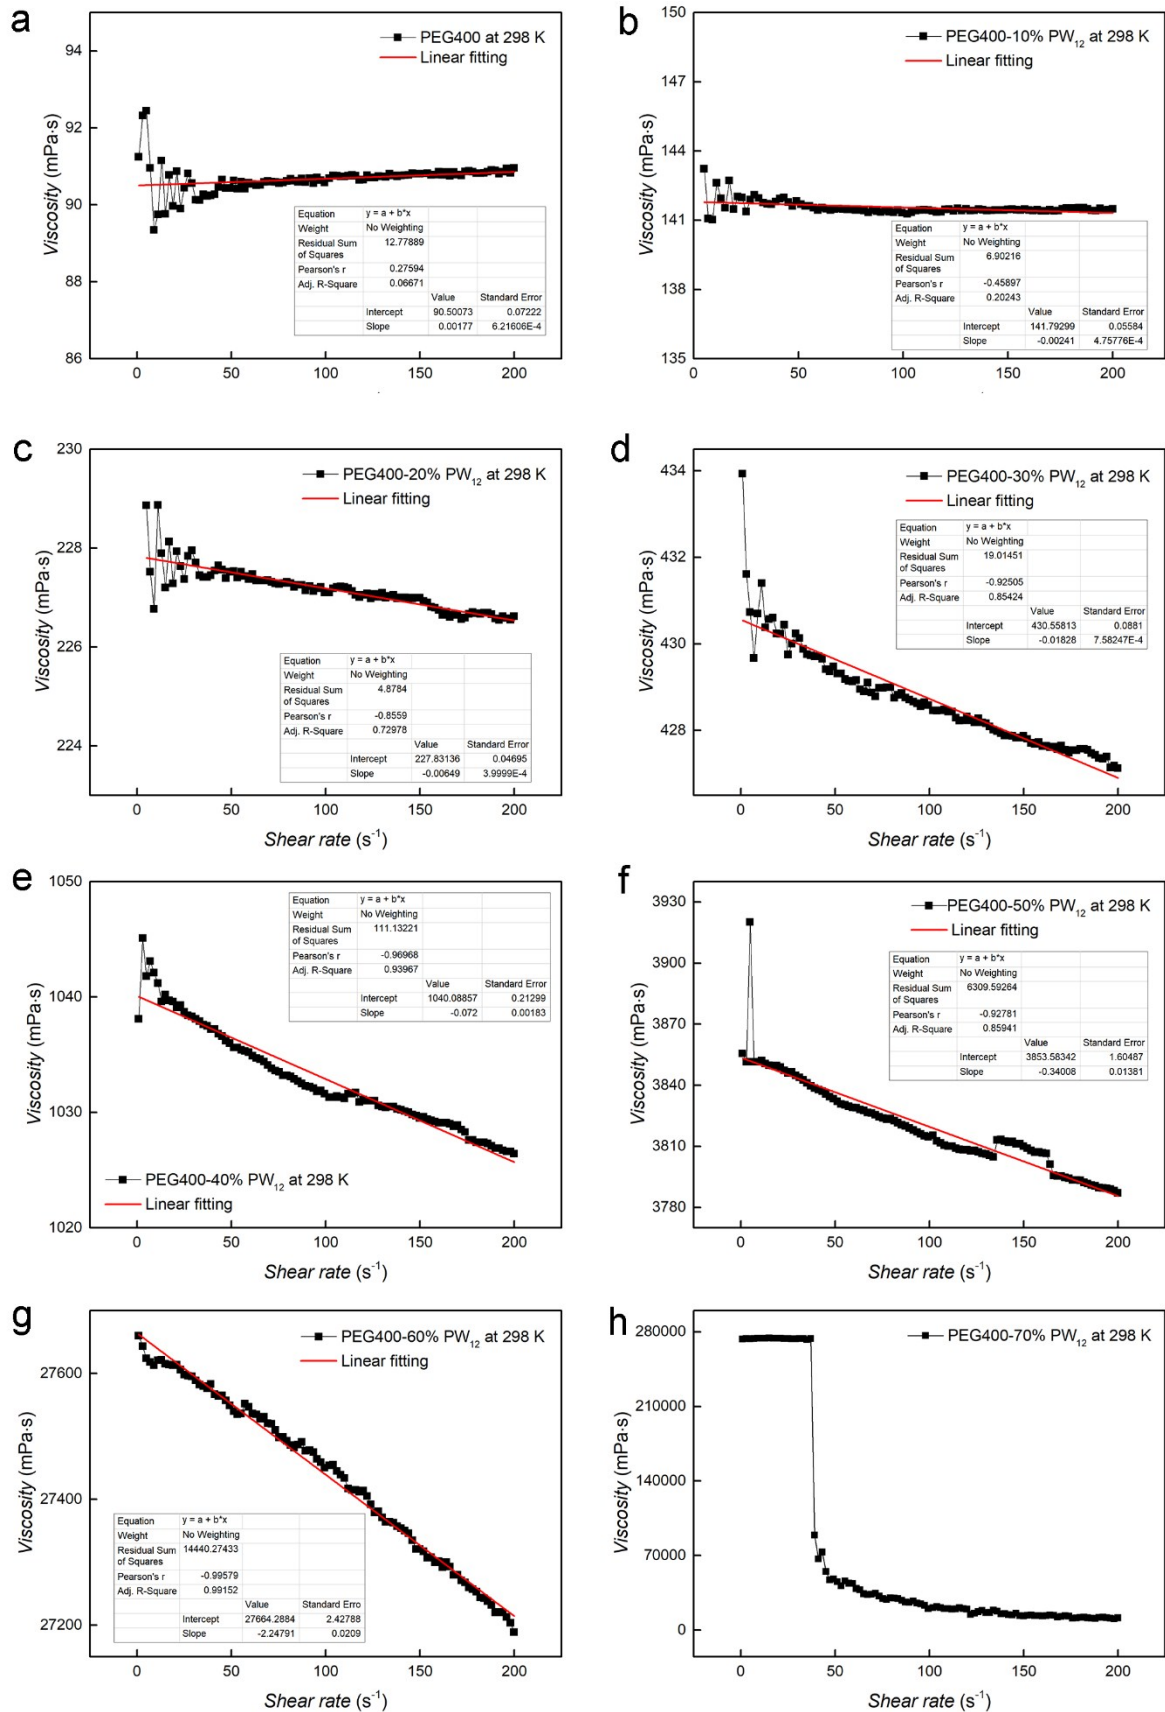

**Fig. S10** Fitting of the flow curves of PEO400-PW<sub>12</sub> nanocomposites at 298 K.

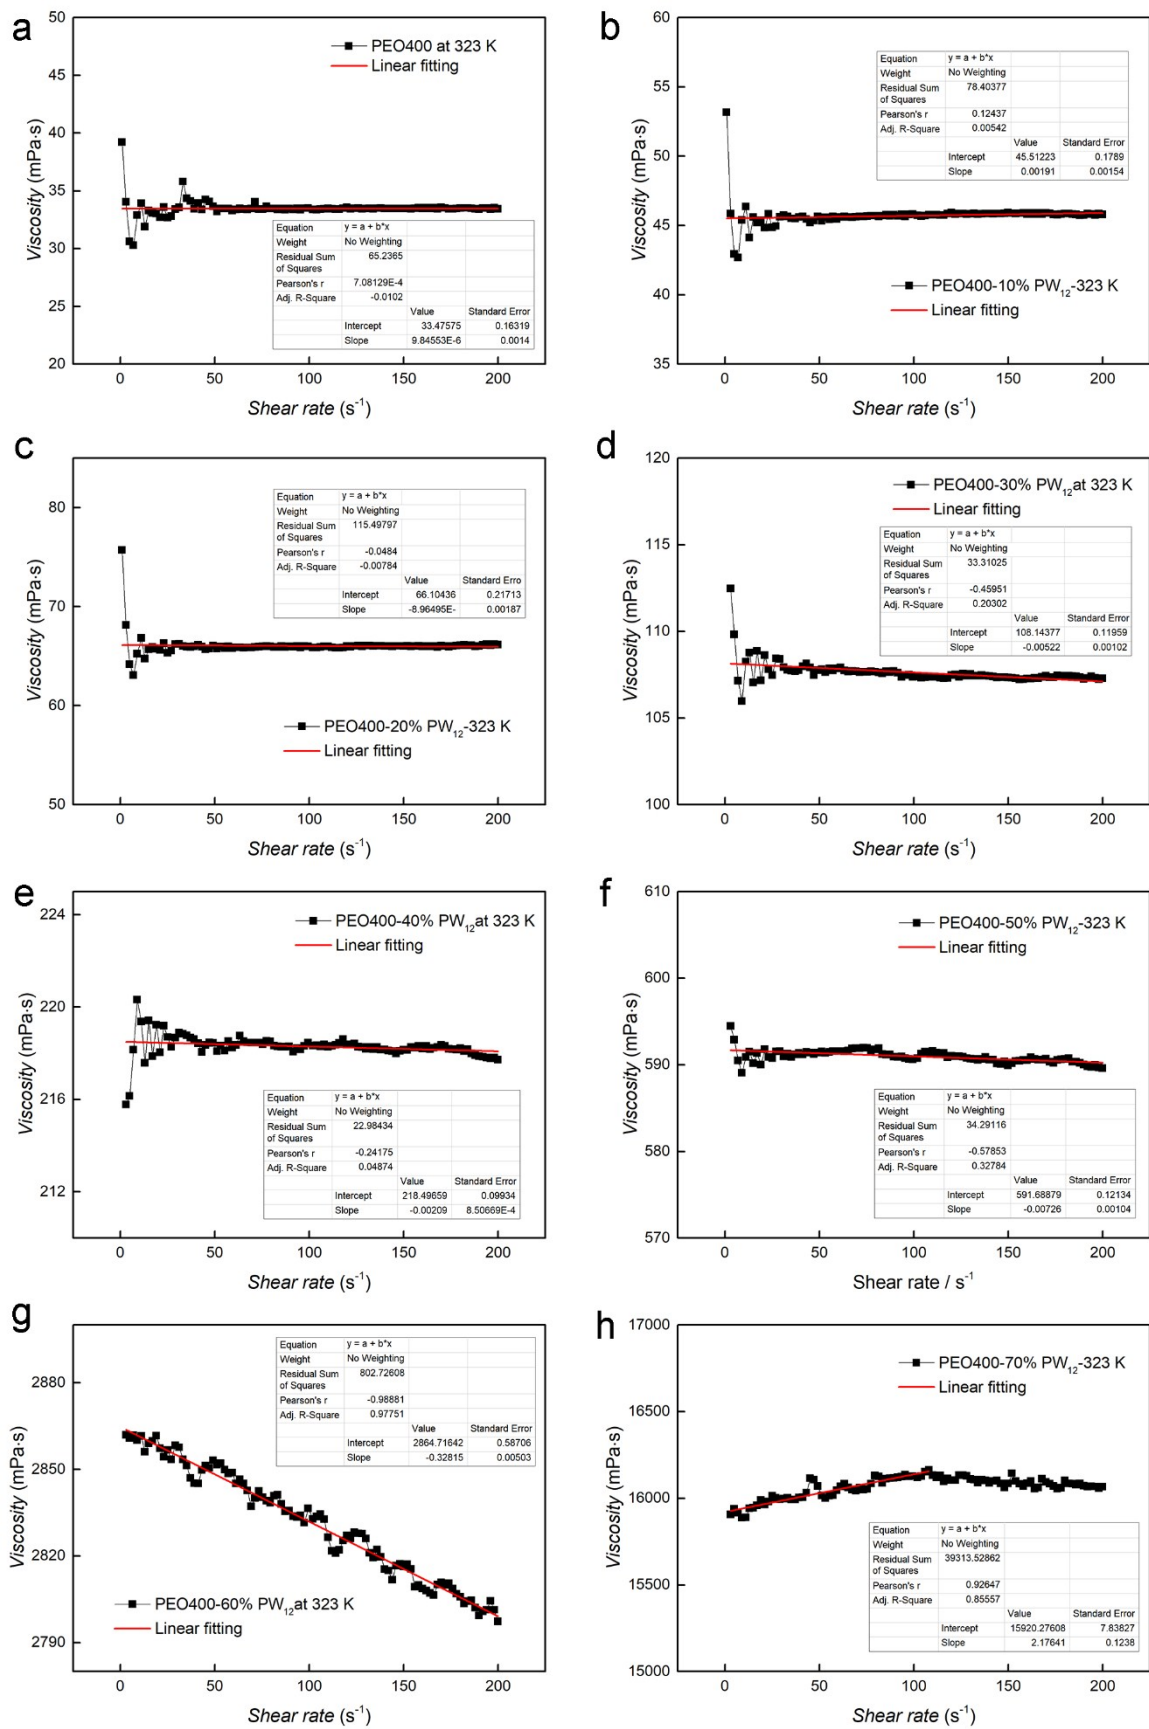

**Fig. S11** Fitting of the flow curves of PEO400-PW<sub>12</sub> nanocomposites at 323 K.

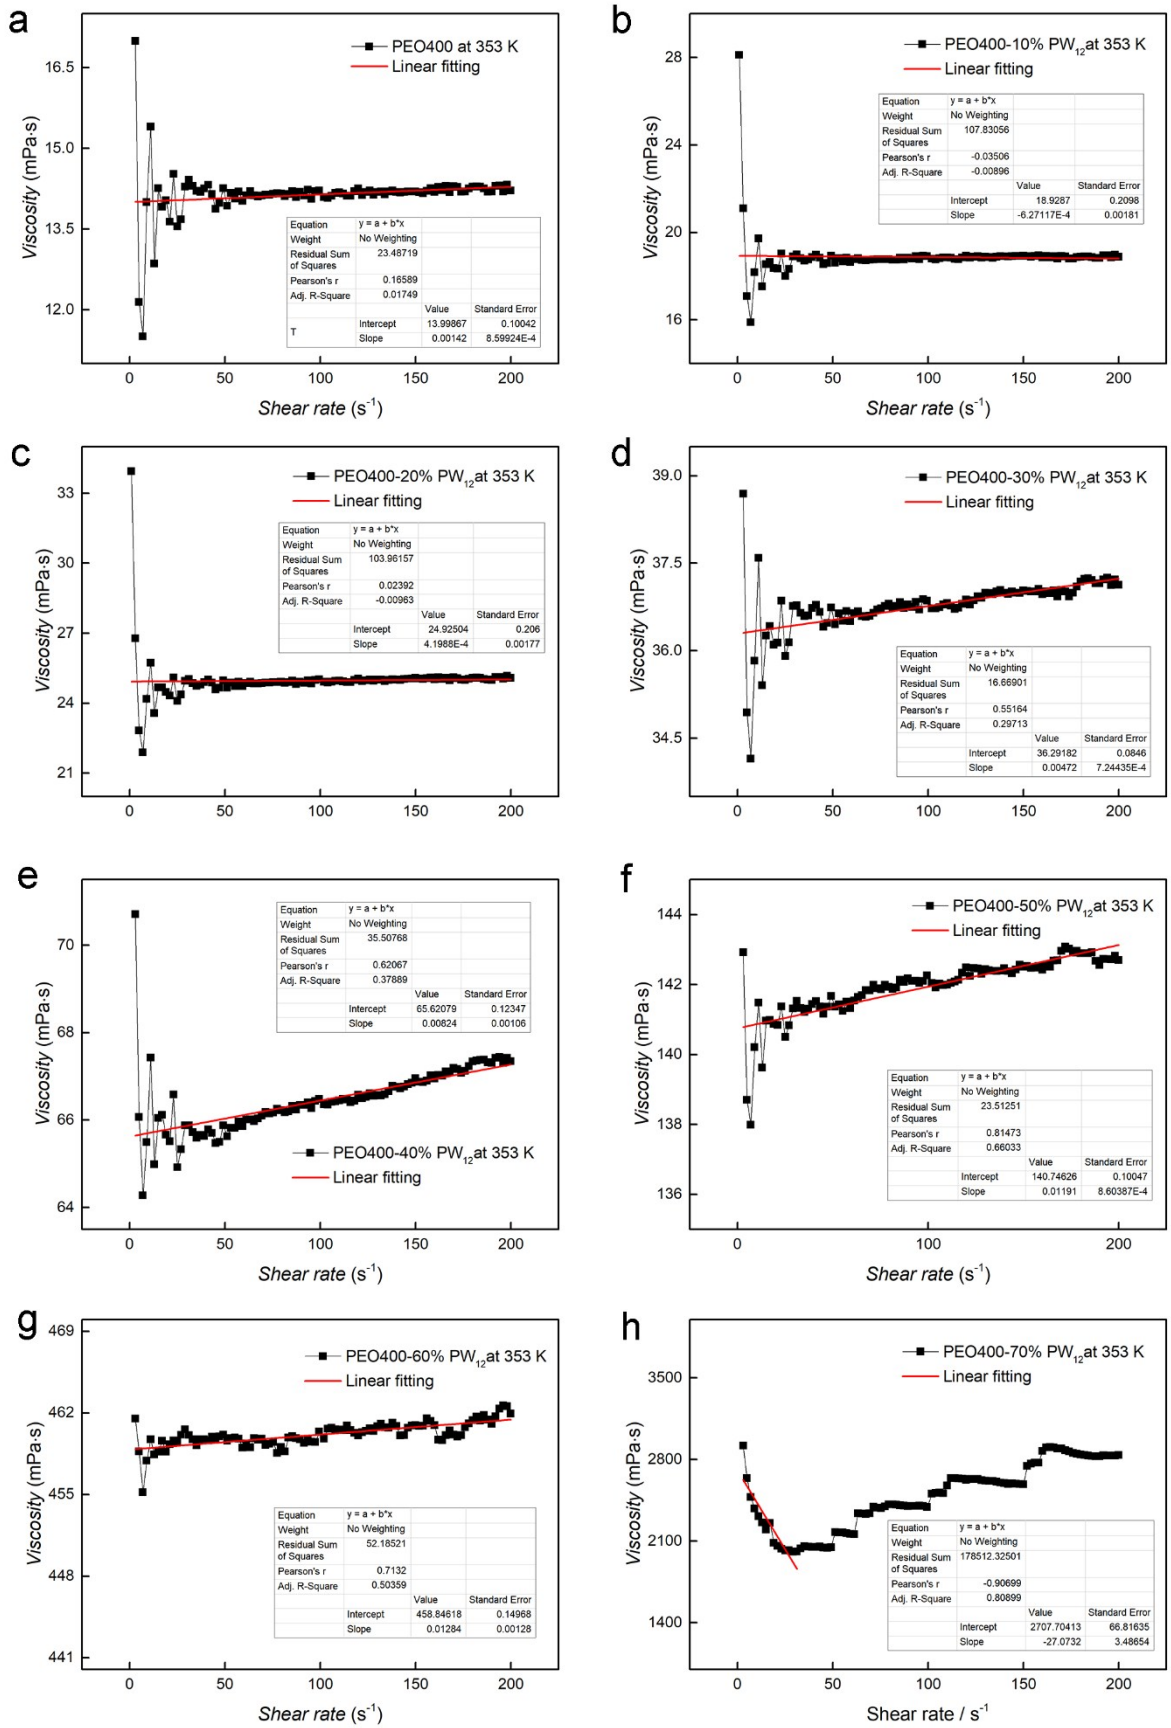

**Fig. S12** Fitting of the flow curves of PEO400-PW<sub>12</sub> nanocomposites at 353 K.
